# Supplementary material for: The C. elegans cGMP-Dependent Protein Kinase EGL-4 Regulates Nociceptive Behavioral Sensitivity
Source: PLOS journal article supplement (doi:10.1371/journal.pgen.1003619), 2013-07-11

## Supplemental Data

Figure S1

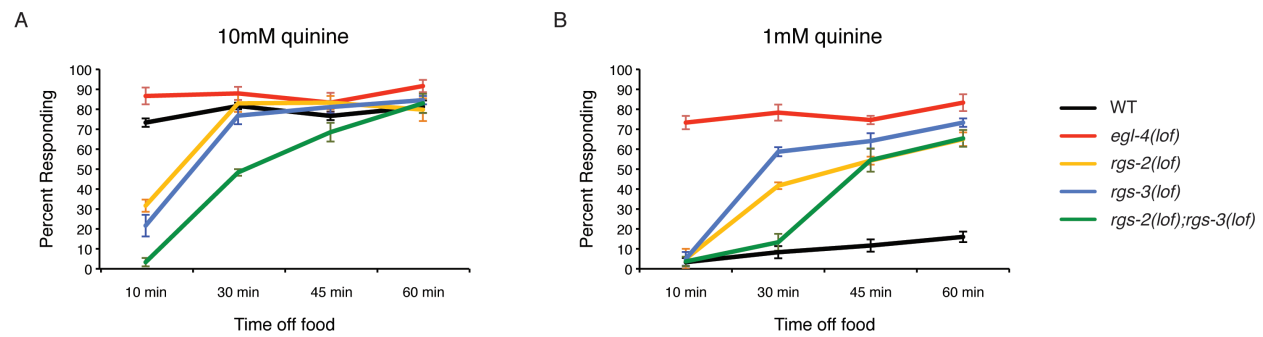

Supplement: S1 (10.1371/journal.pgen.1003619.s001) [file journal.pgen.1003619.s001]
